# Supplementary material for: Molecular Dynamics and MM-PBSA Analysis of the SARS-CoV-2 Gamma Variant in Complex with the hACE-2 Receptor
Source: MDPI journal article supplement (doi:10.3390/molecules27072370), 2022-04-06
Supplement: s1 [file s1]

## Supplementary Materials

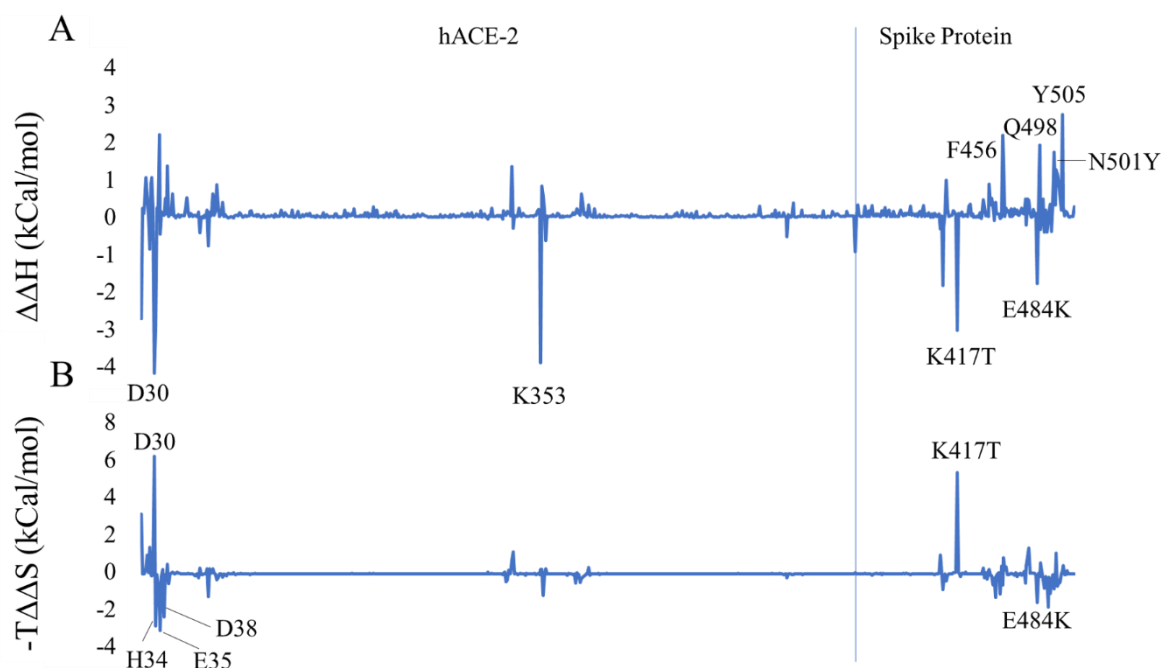

**Figure S1.** MM-PBSA and Interaction entropy residue specific contribution.  $\Delta\Delta G_{\text{total}}$  contribution by residue. (A)  $\Delta\Delta H$  for the wild type complex and gamma variant complex obtained with MM-PBSA technique. (B)  $-T\Delta\Delta S$  for the wild type complex and gamma variant complex obtained by computing the interaction entropy.

**Table S1.** Cristalographic complexes of the six SARS-CoV-2 variants of concern.

| PDB ID              | Variant                | Resolution [Å] | R-Free |
|---------------------|------------------------|----------------|--------|
| 7ekf <sup>[1]</sup> | B.1.1.7 (alpha)        | 2.85           | 0.224  |
| 7ekg <sup>[1]</sup> | B.1.351 (beta)         | 2.63           | 0.248  |
| 7ekc <sup>[1]</sup> | P.1 (gamma)            | 2.80           | 0.225  |
| 6m0j <sup>[2]</sup> | Wuhan-Hu-1 (wild type) | 2.45           | 0.227  |
| 7wbq <sup>[3]</sup> | B.1.617.2 (delta)      | 3.34           | 0.226  |
| 7wbp <sup>[3]</sup> | B.1.1.529 (omicron)    | 3.00           | 0.204  |

1. Han, P.; Su, C.; Zhang, Y.; Bai, C.; Zheng, A.; Qiao, C.; Wang, Q.; Niu, S.; Chen, Q.; Zhang, Y.; et al. Molecular Insights into Receptor Binding of Recent Emerging SARS-CoV-2 Variants. *Nat. Commun.* **2021**, *12*, doi:10.1038/S41467-021-26401-W.
2. Lan, J.; Ge, J.; Yu, J.; Shan, S.; Zhou, H.; Fan, S.; Zhang, Q.; Shi, X.; Wang, Q.; Zhang, L.; et al. Structure of the SARS-CoV-2 Spike Receptor-Binding Domain Bound to the ACE2 Receptor. *Nature* **2020**, *581*, 215–220, doi:10.1038/s41586-020-2180-5.
3. Han, P.; Li, L.; Liu, S.; Wang, Q.; Zhang, D.; Xu, Z.; Han, P.; Li, X.; Peng, Q.; Su, C.; et al. Receptor Binding and Complex Structures of Human ACE2 to Spike RBD from Omicron and Delta SARS-CoV-2. *Cell* **2022**, *185*, 630-640.e10, doi:10.1016/J.CELL.2022.01.001.
